# Supplementary material for: Widespread evidence of cooperative DNA binding by transcription factors in Drosophila development
Source: PubMed Central journal article supplement — Nucleic Acids Res. 2013 Jul 11;41(17):8237–52. doi: 10.1093/nar/gkt598 (PMC3783179; doi:10.1093/nar/gkt598), 2013-07-11
Supplement: supp_gkt598_nar-01097-h-2013-File016.pdf [file supp_gkt598_nar-01097-h-2013-File016.pdf]

# Widespread evidence of cooperative DNA-binding by transcription factors in *Drosophila* development

Majid Kazemian<sup>1,2</sup>, Hannah Pham<sup>3</sup>, Scot A. Wolfe<sup>3,4</sup>, Michael Brodsky<sup>3,5,!</sup>, Saurabh Sinha<sup>1,6,!</sup>

<sup>1</sup>Department of Computer Science and <sup>6</sup>Institute of Genomic Biology, University of Illinois at Urbana-Champaign, Urbana, IL, USA.

<sup>2</sup>Laboratory of Molecular Immunology, National Heart Lung and Blood Institute, National Institutes of Health, MD, USA.

<sup>3</sup>Program in Gene Function and Expression, <sup>4</sup>Department of Biochemistry and Molecular Pharmacology and <sup>5</sup>Department of Molecular Medicine, University of Massachusetts Medical School, MA, USA.

<sup>!</sup>Corresponding authors:

Saurabh Sinha [sinhas@illinois.edu](mailto:sinhas@illinois.edu)

Michael H. Brodsky [Michael.brodsky@umassmed.edu](mailto:Michael.brodsky@umassmed.edu)

**Running title: Identifying sequence signatures of TF interaction**

## Abbreviations:

TF Transcription Factor

BR Bound Region (of a transcription factor)

iTFs “interacting TF signatures” (software tool)

**Table S1. Correlation between computationally predicted and ChIP binding profiles.**

The first column shows the name of ChIP profile, with the three-letter abbreviation in parenthesis indicating the source of the ChIP profile (Mcc: modENCODE ChIP-chip, Mcs: modENCODE ChIP-seq, Bcs: BDTNP ChIP-seq, Bcc: BDTNP ChIP-chip, Fcs: Furlong ChIP-seq, Rcc: Rushlow ChIP-chip), and the number at the end indicating the replicate number, if applicable (1-7). The second column shows the name of the motifs used for computational prediction. All motifs are obtained from FlyFactorSurvey except the Giant (GT) motif, marked with asterisk, that is taken from (2). The third and fourth columns report the Pearson correlation co-efficient and its significance (p-value) between computationally predicted and ChIP binding profiles. The correlation is calculated over all non-overlapping segments of length 500bp that reside in highly accessible (90<sup>th</sup> percentile) regions during stage 5 of development. The fifth column indicates the number of overlaps between the top 2000 bound regions from ChIP profile and the top 2000 high scoring regions from STUBB profile in the accessible regions of the genome. The last column shows the fold enrichment of top ChIP bound regions in the top scoring regions from STUBB profile.

| ChIP profile | Motif profile        | Correlation | P-value  | Overlap | FE   |
|--------------|----------------------|-------------|----------|---------|------|
| (Mcc)ubx     | Ubx_FlyReg           | 0.41        | 0        | 608     | 1.70 |
| (Bcc)mad.2   | Mad_FlyReg           | 0.39        | 0        | 700     | 1.96 |
| (Bcs)hb      | hb_SOLEXA_5          | 0.3         | 0        | 653     | 1.83 |
| (Bcs)bcd     | Bcd_Cell             | 0.29        | 0        | 660     | 1.85 |
| (Bcs)kr      | Kr_NAR               | 0.26        | 0        | 628     | 1.76 |
| (Mcc)eve     | Eve_Cell             | 0.26        | 0        | 463     | 1.30 |
| (Mcc)en      | en_FlyReg            | 0.25        | 0        | 480     | 1.34 |
| (Mcs)disco   | disco-r-Cl1_SANGER_5 | 0.24        | 0        | 474     | 1.33 |
| (Bcc)slp.1   | slp1_NAR             | 0.21        | 2E-228   | 540     | 1.51 |
| (Bcc)z.2     | z_FlyReg             | 0.2         | 2.6E-225 | 515     | 1.44 |
| (Bcc)D.1     | D_NAR                | 0.2         | 3.6E-221 | 544     | 1.52 |
| (Fcs)tin     | Tin_SOLEXA           | 0.2         | 1E-210   | 501     | 1.39 |
| (Bcc)cad     | cad_FlyReg           | 0.19        | 1.2E-201 | 431     | 1.21 |
| (Bcc)hkb.1   | hkb_NAR              | 0.19        | 5.3E-196 | 619     | 1.73 |
| (Bcs)gt      | gt_bdtnp*            | 0.19        | 1.1E-189 | 551     | 1.54 |
| (Bcc)sna.1   | sna_SOLEXA_5         | 0.19        | 6.6E-189 | 570     | 1.60 |
| (Mcc)bab     | bab1_SANGER_5        | 0.19        | 2E-188   | 531     | 1.49 |
| (Bcc)h.1     | h_SANGER_5           | 0.17        | 9.5E-152 | 634     | 1.78 |
| (Bcc)run.1   | run_Bgb_NBT          | 0.16        | 1.6E-140 | 562     | 1.57 |
| (Fcs)twi     | twi_FlyReg           | 0.16        | 3.5E-132 | 665     | 1.85 |
| (Bcc)tll.1   | tll_NAR              | 0.15        | 2.4E-115 | 487     | 1.36 |
| (Mcc)dll     | Dll_Cell             | 0.14        | 8.9E-112 | 471     | 1.32 |
| (Bcc)dl.3    | dl_FlyReg            | 0.14        | 2.8E-102 | 437     | 1.22 |
| (Bcc)ftz.3   | ftz-f1_FlyReg        | 0.11        | 1.6E-67  | 458     | 1.28 |
| (Mcc)GATAe   | GATAe_SANGER_5       | 0.11        | 1.2E-63  | 421     | 1.18 |
| (Bcc)prd.FQ  | prd_NAR              | 0.09        | 1.5E-42  | 546     | 1.53 |
| (Rcc)zld     | vfl_SOLEXA_5         | 0.09        | 8.1E-41  | 637     | 1.78 |
| (Bcc)da.2    | da_SANGER_10         | 0.08        | 2.1E-35  | 577     | 1.62 |
| (Mcc)inv     | Inv_Cell             | 0.07        | 2.2E-30  | 350     | 0.98 |
| (Bcc)shn.2   | shn-F1-2_SANGER_5    | 0.07        | 4.2E-27  | 530     | 1.48 |
| (Bcc)kni.2   | kni_FlyReg           | 0.06        | 1.1E-19  | 466     | 1.31 |
| (Mcc)ttk     | ttk_NAR              | -0.03       | 1        | 309     | 0.87 |
| (Bcc)med.2   | Med_FlyReg           | -0.1        | 1        | 411     | 1.15 |

**Table S2. [Separately uploaded Excel file] Spatial expression pattern of all 322 TFs.** For each motif, shown is the list of term ids (separated by commas) and term names (separated by “;;”) that the corresponding TF gene is annotated with, as per BDGP.

**Table S3. [Separately uploaded Excel file] All 1926 TF-pairs (5% FDR) with site arrangement.** Please refer to legend of Table 2 in main text for detailed information about columns.

**Table S4. [Separately uploaded file] List of TF-pairs in each of 711 clusters from Figure 5.** Each row represents a cluster and lists all the TF-pairs in that cluster, separated by tabs. The two TFs of a TF-pair are separated by “:”. The clusters are sorted by their size with the largest cluster appearing in the first row.

**Table S5. Assessing site arrangements among TFs with known physical interaction.** Shown are 13 TF-pairs with known PPI (7 homotypic and 6 heterotypic) that have strong site arrangement. Please refer to the legend of Table 2 in the main text for detailed information about columns.

|             | Motif1                                                                                                      | Motif2                                                                                                  | Family                 | Ori. type                        | Ori.                | 0-10bp |                         | 10-25bp |                         |
|-------------|-------------------------------------------------------------------------------------------------------------|---------------------------------------------------------------------------------------------------------|------------------------|----------------------------------|---------------------|--------|-------------------------|---------|-------------------------|
|             |                                                                                                             |                                                                                                         |                        |                                  |                     | Dist.  | OSD                     | Dist.   | OSD                     |
| Homotypic   | Trl_FlyReg<br>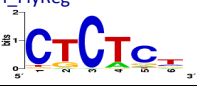             | Trl_FlyReg<br>         | (GAGA)                 | → < -<br>< - →<br>→ →<br>< - < - | -<br>7e-15<br>7e-15 | 3e-22  | 2e-27<br>2e-27          | 1e-12   | 2e-11<br>2e-11          |
|             | lola_SOLEXA_5<br>          | lola_SOLEXA_5<br>      | (ZF-C2H2)              | → < -<br>< - →<br>→ →<br>< - < - | -<br>-<br>-<br>-    | 3e-10  | 0.004<br>1e-07<br>1e-07 | 3e-14   | 8e-04<br>3e-07<br>1e-06 |
|             | jigr1_SANGER_5*<br>        | jigr1_SANGER_5<br>     | (MADF)                 | → < -<br>< - →<br>→ →<br>< - < - | -<br>-<br>-<br>-    | 6e-07  | 7e-04<br>3e-04<br>3e-04 | 5e-06   | -<br>2e-05<br>2e-05     |
|             | Adf1_SANGER_5<br>          | Adf1_SANGER_5<br>      | (MADF)                 | → < -<br>< - →<br>→ →<br>< - < - | 1.4e-05<br>1.4e-05  | 1e-05  | 0.003<br>0.003          | -       | -                       |
|             | CG12155_SANGER_5<br>       | CG12155_SANGER_5<br>   | (MADF)                 | → < -<br>< - →<br>→ →<br>< - < - | -<br>-<br>-<br>-    | 4e-04  | 5e-05<br>5e-05          | -       | 0.002<br>0.002          |
|             | Ci_SANGER_5<br>           | Ci_SANGER_5<br>       | (ZF-C2H2)              | → < -<br>< - →<br>→ →<br>< - < - | -<br>-<br>-<br>-    | 0.003  | 2e-05<br>2e-05          | -       | -                       |
| Heterotypic | CG8319_SOLEXA_2.5*<br>   | Opa_SANGER_5<br>     | (ZF-C2H2)<br>(ZF-C2H2) | → < -<br>< - →<br>→ →<br>< - < - | -<br>-<br>-<br>-    | 7e-06  | 6e-04<br>0.004          | -       | -                       |
|             | Ci_SANGER_5<br>          | nau_da_SANGER_5<br>  | (ZF-C2H2)<br>(bHLH)    | → < -<br>< - →<br>→ →<br>< - < - | -<br>-<br>-<br>-    | 1e-05  | 0.002                   | -       | -                       |
|             | brk_FlyReg<br>           | knrl_SANGER_5<br>    | (BRK)<br>(ZF-C4)       | → < -<br>< - →<br>→ →<br>< - < - | -<br>-<br>-<br>-    | 2e-05  | 0.001                   | -       | -                       |
|             | Caup_SOLEXA*<br>         | Mirr_SOLEXA<br>      | (HOMEBOX)<br>(HOMEBOX) | → < -<br>< - →<br>→ →<br>< - < - | -<br>-<br>-<br>-    | -      | 6e-07                   | 3e-04   | -                       |
|             | HLHm3_SANGER_5<br>       | ato_da_SANGER_10<br> | (bHLH)<br>(bHLH)       | → < -<br>< - →<br>→ →<br>< - < - | -<br>-<br>-<br>-    | 2e-05  | 0.002<br>0.002          | -       | -                       |
|             | HLHmbeta_SANGER_10*<br>  | ato_da_SANGER_10<br> | (bHLH)<br>(bHLH)       | → < -<br>< - →<br>→ →<br>< - < - | -<br>-<br>-<br>-    | 7e-05  | 0.003                   | -       | -                       |
|             | HLHmgamma_SANGER_10*<br> | da_SANGER_10<br>     | (bHLH)<br>(bHLH)       | → < -<br>< - →<br>→ →<br>< - < - | -<br>-<br>-<br>-    | -      | -                       | -       | 7e-05                   |

**Table S6. Selected instances of various site arrangements among TFs.** The first 5 examples show orientation, distance, and OSD bias. The next 5 examples only have distance and OSD biases. Some of the cases show distance and/or OSD bias over multiple distance ranges (e.g. Sp1, Sp1). Please refer to legend of Table 2 in the main text for detailed information about columns.

| Motif1                                                                                                     | Motif2                                                                                                    | Family                 | Ori. type                                | Ori.                    | 0-10bp |                         | 10-25bp |                         | 25-50bp |       | 50-100bp |       |
|------------------------------------------------------------------------------------------------------------|-----------------------------------------------------------------------------------------------------------|------------------------|------------------------------------------|-------------------------|--------|-------------------------|---------|-------------------------|---------|-------|----------|-------|
|                                                                                                            |                                                                                                           |                        |                                          |                         | Dist.  | OSD                     | Dist.   | OSD                     | Dist.   | OSD   | Dist.    | OSD   |
| 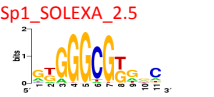<br>Sp1_SOLEXA_2.5        | <br>Sp1_SOLEXA_2.5       | (zf-C2H2)<br>(zf-C2H2) | → > < -<br>< - → ><br>→ > → ><br>< - < - | -<br>1.1e-09<br>1.1e-09 | 8e-29  | -<br>7e-34<br>7e-34     | 5e-09   | 0.002<br>2e-07<br>2e-07 | -       | -     | -        | -     |
| <br>CG12029_SOLEXA_5      | <br>btd_NAR              | (zf-C2H2)<br>(zf-C2H2) | → > < -<br>< - → ><br>→ > → ><br>< - < - | 2.6e-09<br>0.00033      | 2e-23  | 2e-18<br>1e-17          | 2e-04   | 5e-05                   | -       | -     | -        | -     |
| <br>CG5953_SANGER_5       | <br>jim_F1-9_SOLEXA_2.5  | (MADF)<br>(zf-C2H2)    | → > < -<br>< - → ><br>→ > → ><br>< - < - | 0.0041                  | 1e-04  | 1e-09                   | -       | -                       | -       | -     | -        | -     |
| <br>CG5669_SOLEXA_5       | <br>Rel_SANGER_5         | (zf-C2H2)<br>(RHD_TIG) | → > < -<br>< - → ><br>→ > → ><br>< - < - | 1.2e-05                 | 3e-05  | 2e-07<br>0.002          | -       | -                       | -       | -     | -        | -     |
| <br>CG12029_SOLEXA_5     | <br>Opa_SANGER_5        | (zf-C2H2)<br>(zf-C2H2) | → > < -<br>< - → ><br>→ > → ><br>< - < - | 5.9e-06                 | 8e-08  | 3e-07<br>9e-05          | -       | -                       | -       | -     | -        | -     |
| <br>bab1_SANGER_5       | <br>bab1_SANGER_5      | (HTH_psq)<br>(HTH_psq) | → > < -<br>< - → ><br>→ > → ><br>< - < - | -                       | 3e-09  | 2e-06<br>4e-04<br>4e-04 | 4e-07   | 4e-05<br>4e-05          | -       | -     | -        | -     |
| <br>Eip75B_SANGER_5     | <br>da_SANGER_10       | (zf-C4)<br>(bHLH)      | → > < -<br>< - → ><br>→ > → ><br>< - < - | -                       | -      | -                       | 3e-07   | -                       | -       | -     | -        | -     |
| <br>HLHmdelta_SANGER_10 | <br>l3neo38_SOLEXA_2.5 | (bHLH)<br>(zf-C2H2)    | → > < -<br>< - → ><br>→ > → ><br>< - < - | -                       | -      | -                       | -       | 0.002                   | 1e-06   | -     | -        | -     |
| <br>Dfd_SOLEXA          | <br>HLHm7_SANGER_5     | (Homeobox)<br>(bHLH)   | → > < -<br>< - → ><br>→ > → ><br>< - < - | -                       | -      | -                       | -       | -                       | -       | 2e-05 | 0.002    | 0.004 |
| <br>Awh_SOLEXA          | <br>Mes2_SANGER_5      | (Homeobox)<br>(MADF)   | → > < -<br>< - → ><br>→ > → ><br>< - < - | -                       | -      | -                       | -       | -                       | -       | 0.002 | -        | 2e-06 |

**Table S7. [Separately uploaded Excel file] Relationships based on site arrangement biases.** For each TF, shown is the number of TFs with site arrangement bias (second column). The third and fourth columns report the TF family and additional binding domain(s) if any, respectively.

**Table S8. [Separately uploaded Excel file] Measurement of direct, in vitro interaction between TF pairs.** All the constructs are provided in the second worksheet.

**Table S9. [Separately uploaded Excel file] DNA binding measurements for five homo or heterotypic TF-TF interactions.** All the constructs, oligos, and measurements are included in the separate worksheets.

**Table S10. [Separately uploaded Excel file] Detailed DNA binding measurements for five homo or heterotypic TF-TF interactions.** All the constructs, oligos, and measurements are included in the separate worksheets.

**Table S11. Fisher Exact test contingency table.** We divided the adjacent binding site pairs from the “real” and “background” data sets into those within a range of  $d$  bp and those outside range  $d$  bp.

| #Adjacent pairs | $d \sim$ range | $d <>$ range |
|-----------------|----------------|--------------|
| Real            | a              | b            |
| Background      | c              | d            |

**Figure S1. Comparison between iTFs and SpaMo.** For each method, the graph shows the number of predicted TF-pairs (out of 100) with distance bias, as a function of false positive rate. Blue and red lines correspond to homotypic and heterotypic TF-pairs, respectively. SpaMo was run with default parameter settings (see methods) here, unlike in Figure 2 where SpaMo was run with settings more comparable to those of iTFs.

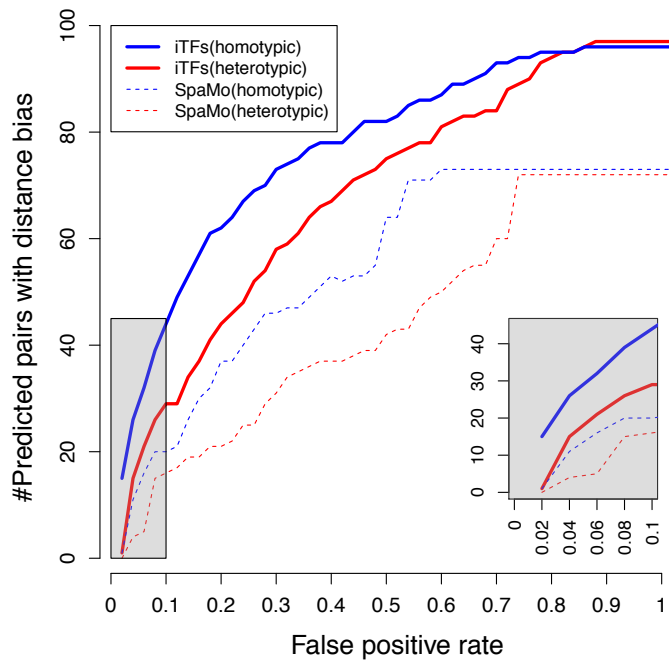



**Figure S2. Site arrangement biases.** (A) Each bar represents the average number of partners for each TF in that family before removal of “similar” TF-pairs. (Only TF families with more than 10 TFs included in our analysis are shown.) (B,C) The scatter plots show the number of partners with and without removal of “similar” TF-pairs for each TF (B) and each Family (C).

**A)**

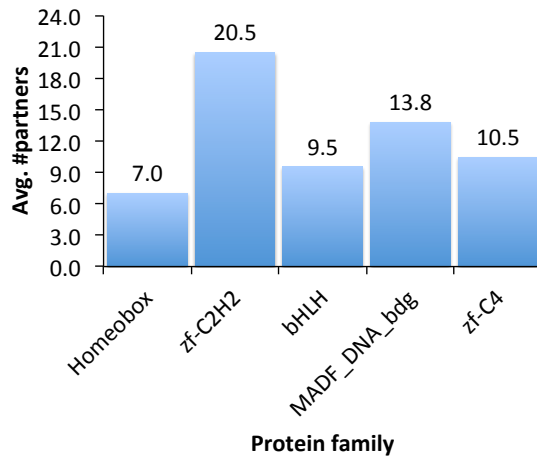

**B)**

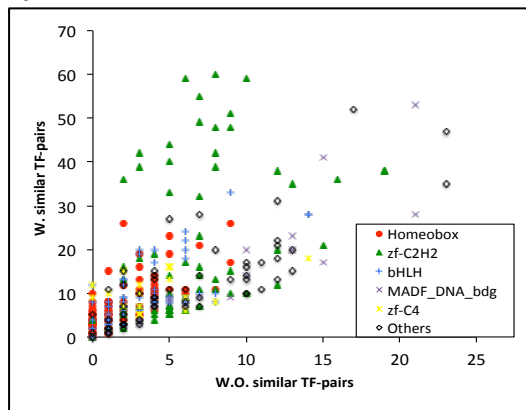

**C)**

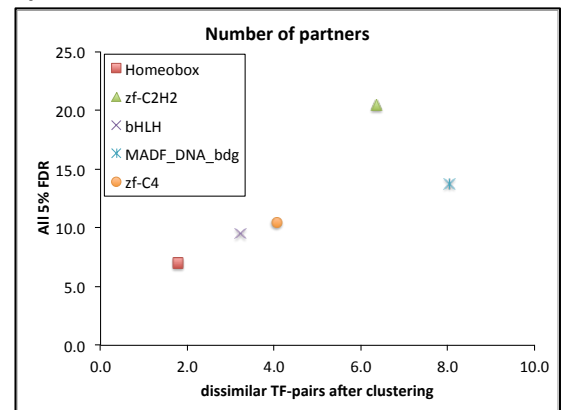

**Figure S3. Genome browser view of selected co-bound regions (oligos) for five TF-pairs with cooperative binding to DNA.** The motifs of selected TF-pairs are shown in the first column. The genome browser view of selected regions includes four tracks, Flybase genes, experimental ChIP profile(s), REDfly enhancers, and STUBB scores for the motifs. The filled green box represents the candidate oligo.

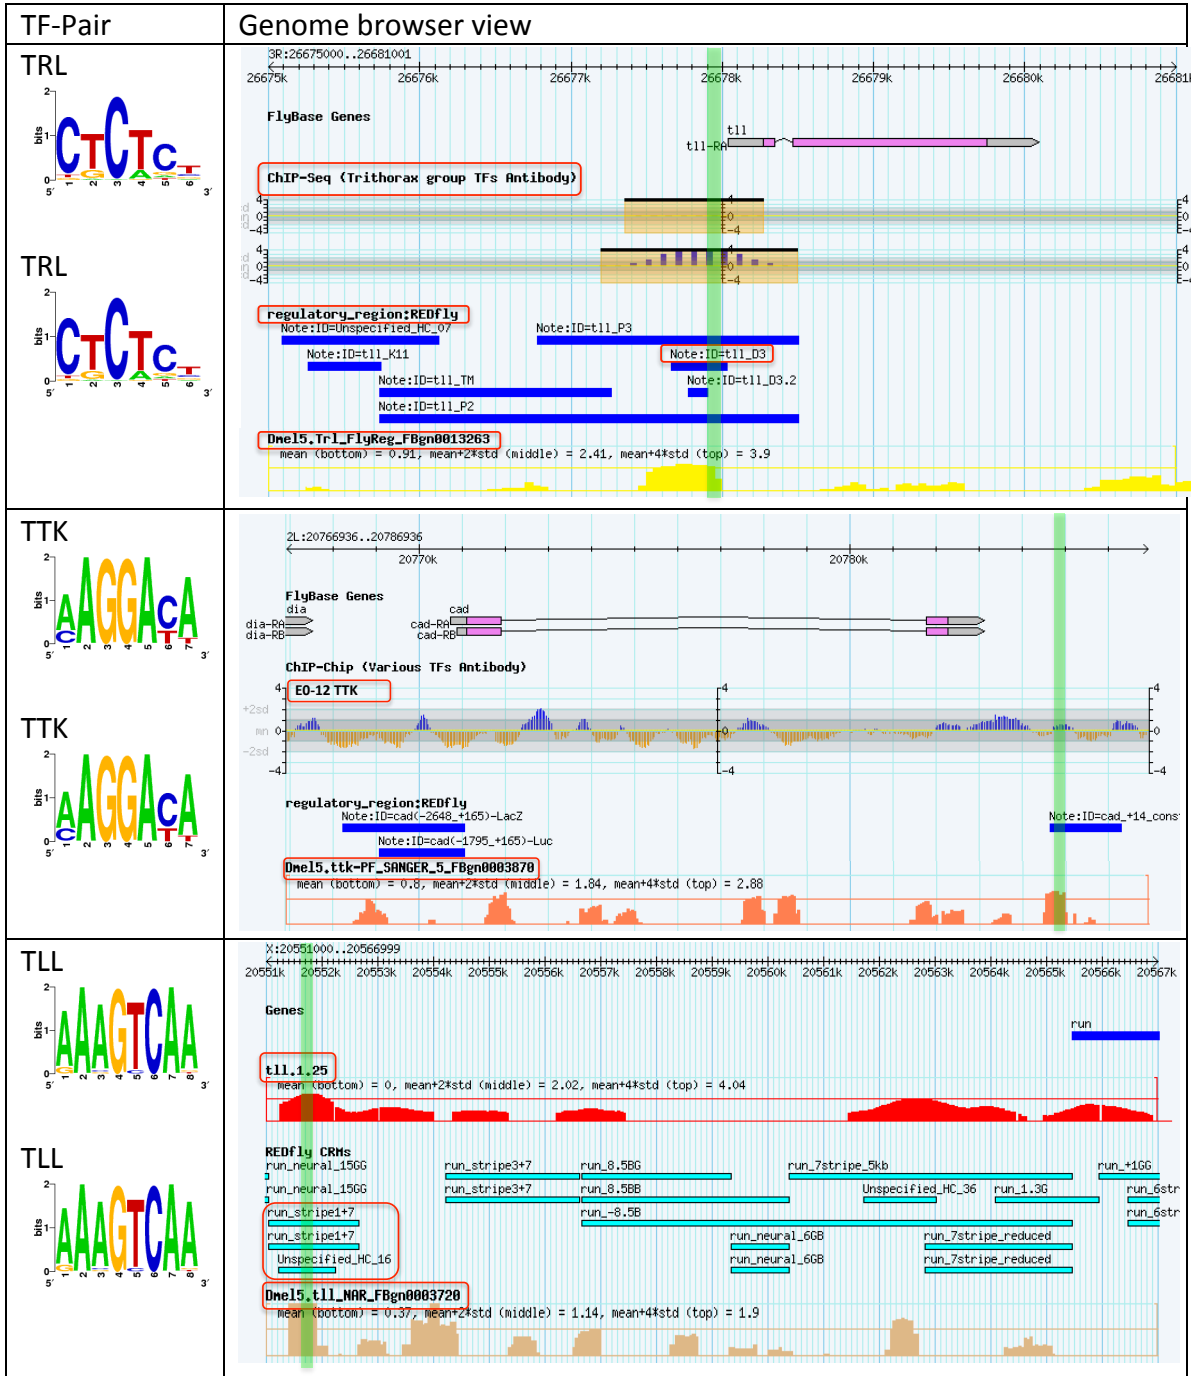

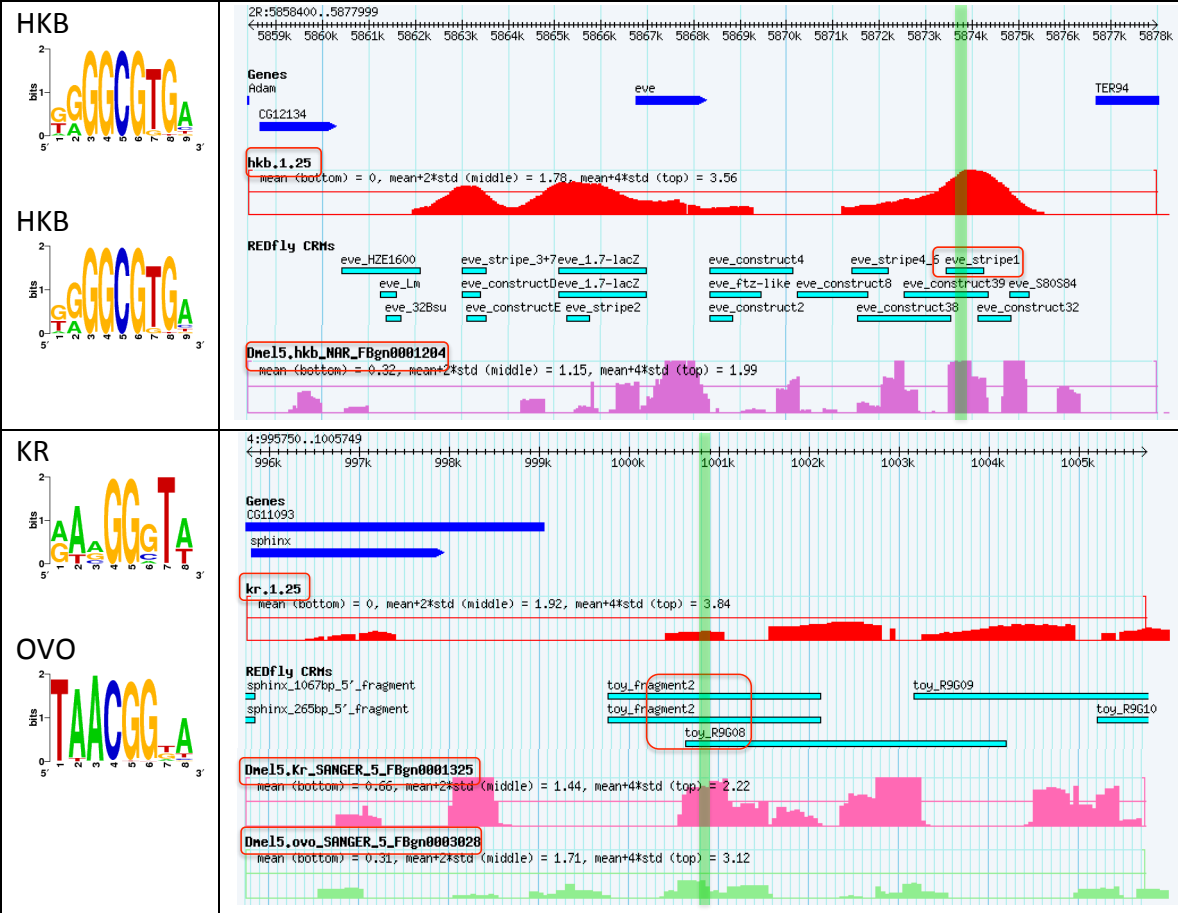

**Figure S4. Distance preference profiles for five selected TF-pairs.** The motifs of selected TF-pairs are shown in the first column. The second column plots the distance and OSD preferences ( $-\log$  p-value) as a function of inter-site spacing between the two motifs. (Black dashed line corresponds to distance bias and colored lines correspond to OSD bias, for different orientations as shown in inset.)

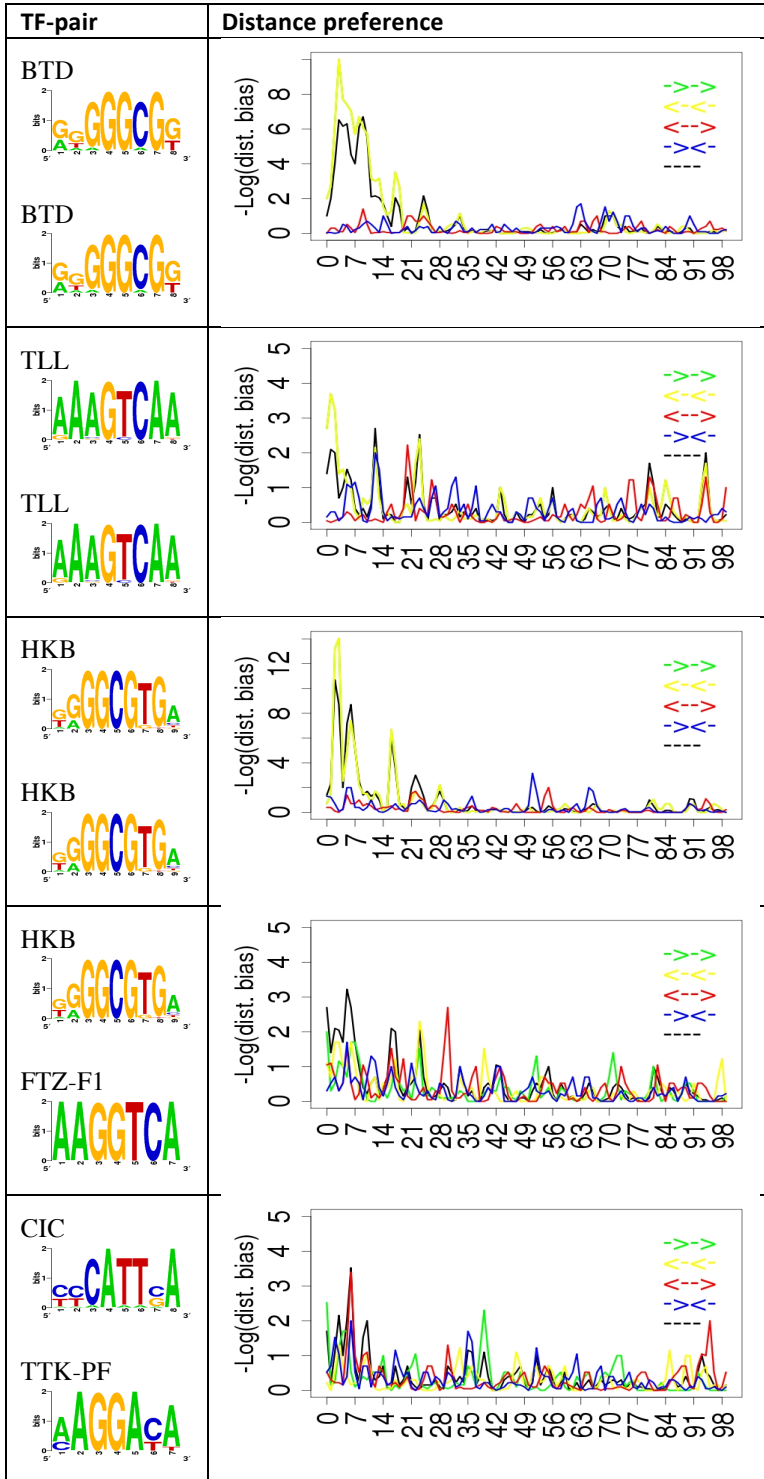

**Figure S5.** Combined histogram of binding site locations in sequences analyzed by iTFs. For each of the 10 TFs with most number of partners as reported in manuscript, we examined the top 500 predicted bound regions of that TF, and annotated binding sites of the TF in each of these 500-bp regions. All of these binding sites were collected together and the distribution of their location within the 500-bp region is shown here.

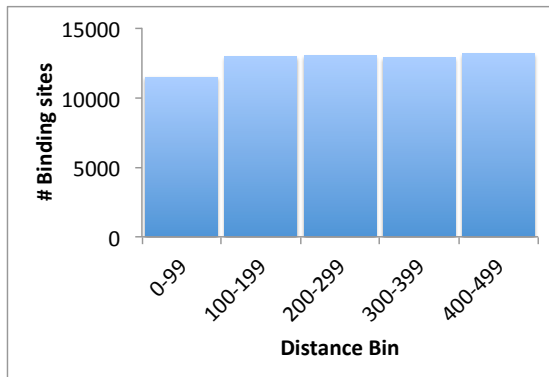

**Supplementary Note 1. Calculating the significance of abundance/depletion of site arrangement biases in a TF family.** For each TF (out of N=322), we recorded the number of partners with site arrangement bias (Table S7). We counted the number of TFs that have  $\geq 5$  partners, and denoted this by  $m$ . We then counted the total number of TFs and the number of TFs with  $\geq 5$  partners in each TF family, denoted by  $n$  and  $k$  respectively. We finally calculated the significance of abundance of site arrangement biases in a TF family using a Hypergeometric test of significance,  $H(k, N, n, m)$ . To obtain the significance of depletion of site arrangement in a TF family, we set  $m$  and  $k$  to be the number of TFs with no partner and the number of TFs of the family that had no partners.

## REFERENCES

1. Li, X.Y., MacArthur, S., Bourgon, R., Nix, D., Pollard, D.A., Iyer, V.N., Hechmer, A., Simirenko, L., Stapleton, M., Luengo Hendriks, C.L. *et al.* (2008) Transcription factors bind thousands of active and inactive regions in the *Drosophila* blastoderm. *PLoS Biol*, **6**, e27.
2. Kaplan, T., Li, X.Y., Sabo, P.J., Thomas, S., Stamatoyannopoulos, J.A., Biggin, M.D. and Eisen, M.B. (2011) Quantitative models of the mechanisms that control genome-wide patterns of transcription factor binding during early *Drosophila* development. *PLoS Genet*, **7**, e1001290.
3. MacArthur, S., Li, X.Y., Li, J., Brown, J.B., Chu, H.C., Zeng, L., Grondona, B.P., Hechmer, A., Simirenko, L., Keranen, S.V. *et al.* (2009) Developmental roles of 21 *Drosophila* transcription factors are determined by quantitative differences in binding to an overlapping set of thousands of genomic regions. *Genome Biol*, **10**, R80.
4. Zinzen, R.P., Girardot, C., Gagneur, J., Braun, M. and Furlong, E.E. (2009) Combinatorial binding predicts spatio-temporal cis-regulatory activity. *Nature*, **462**, 65-70.
5. Nien, C.Y., Liang, H.L., Butcher, S., Sun, Y., Fu, S., Gocha, T., Kirov, N., Manak, J.R. and Rushlow, C. (2011) Temporal coordination of gene networks by Zelda in the early *Drosophila* embryo. *PLoS Genet*, **7**, e1002339.
6. Celniker, S.E., Dillon, L.A., Gerstein, M.B., Gunsalus, K.C., Henikoff, S., Karpen, G.H., Kellis, M., Lai, E.C., Lieb, J.D., MacAlpine, D.M. *et al.* (2009) Unlocking the secrets of the genome. *Nature*, **459**, 927-930.
7. Schuettengruber, B., Ganapathi, M., Leblanc, B., Portoso, M., Jaschek, R., Tolhuis, B., van Lohuizen, M., Tanay, A. and Cavalli, G. (2009) Functional anatomy of polycomb and trithorax chromatin landscapes in *Drosophila* embryos. *PLoS Biol*, **7**, e13.
